1 Title:

2 Retroviral origins of the *Caenorhabditis elegans* orphan gene F58H7.5.

3

4 Author:

5 Wadim J Kapulkin MRCVS, DVM, PhD \*#

6 #corresponding author

7 e-mail: <wadim\_kapulkin@yahoo.co.uk>

8

9 Phone: (+44)7466449215

10

11

12 Present Affiliation:

13

14 \* Veterinary Consultancy

15 Conrada 16/65

16 01-922 Warsaw

17 Poland

18

19

20

21

22

23

24 Abstract:

25

26 This work describes the results of the genome-scale analysis of  
27 endogenous retrovirus insertions in two *C. elegans* isolates: the prototype N2  
28 (Bristol) and CB4856 (Hawaii). In total thirteen, identification of potentially  
29 replication competent, endogenous retroviral elements is described. Ten  
30 elements were identified as conserved between N2 and CB4856 by the  
31 reciprocal match of paired LTRs. The description focuses on the particular  
32 endogenous retrovirus insertion which is identified on the proximal arm of the  
33 chromosome IV (located at positions IV: 912,948 – 921,658 and IV: 899,767 – 908,485  
34 of the N2 and CB4856 respectively). In both isolates the inserted provirus is  
35 flanked by the predicted long terminal repeats (LTR)s of the length of 415 bp and  
36 of identical sequence. Provided the absolute LTR sequence identity this  
37 particular provirus represents insertion acquired prior to split from the common  
38 ancestor, suggesting this insertion event is evolutionary recent. The identified  
39 insertion of the endogenous retrovirus embeds the orphan gene F58H7.5,  
40 specific to *C. elegans* lineage. This unprecedented example establishes that in  
41 the evolutionary past *C. elegans*, had acquired the gene of the retroviral origins  
42 presumably via mechanisms involving the RNA intermediate.

43

44

45

46

47 Importance:

48

49 This work describes the retroviral origins of *C. elegans* orphan gene F58H7.5.

50 Presented work implies that in the evolutionary past the *C. elegans* have

51 acquired new gene as a result of the infection event. *C. elegans* is presently

52 regarded as genetic model organism widely used in genetic research. The

53 genome of *C. elegans* have been sequenced nearly 20 years ago. This

54 unprecedented example establishes that in the evolutionary past *C. elegans*

55 genome, had acquired the gene of the retroviral origins presumably via

56 mechanisms involving the RNA intermediate.

57

58

59

60

61

62

63

64

65

66

67

68

69

70 Introduction:

71

72 Endogenous retroviruses and LTR retrotransposons are ubiquitously  
73 present in eukaryotic genomes. Endogenous retroviruses and LTR  
74 retrotransposons are widely assumed to replicate via RNA intermediates.  
75 Endogenous retrovirus insertions present in the genomes are thought to  
76 represent the remnants of the infectious events of the past evolutionary history.  
77 Examples of an active endogenous retroviruses however are found almost  
78 invariably among metazoan genomes, and contribute to the reverse flow of the  
79 genetic information. Benign endogenous retroviruses that are found inserted into  
80 genomes of animals and are known to contribute to phenotypic traits and overall  
81 genetic variation. Importantly, certain endogenous retroviruses are known for the  
82 potential to convert into active retroviruses (i.e. Moloney Leukemia Virus (Stoye  
83 and Coffin 1987)) and Mouse Mammary Tumor Virus (Bittner 1936)) and those  
84 are grouped together with circulating retroviruses (i.e. Rous Sarcoma Virus  
85 (Rous 1911)) often with significant pathogenic potential and therefore pose an  
86 active and significant threat to the health of the animal populations. Infectious  
87 properties of the retroviral particles led to development of the retroviral vectors as  
88 means to efficiently insert proviral DNA into genomes. In contrast, particularly  
89 well studied genetic model organism, *C. elegans* appears to harbor considerably  
90 fewer LTR elements than other animal models. Further, sparse endogenous  
91 retroviruses inserted into *C. elegans* appear mostly dormant and do not appear  
92 to significantly contribute to observable traits. One notable exception is the

93 RETR-1 element (Britten 1995) inserted into *C. elegans* plg-1 locus, (Papoli et al.  
94 2007) contributing to natural variation in the copulatory plug polymorphism  
95 (Doniach and Hodgkin 1995). The active transposition and replication of the  
96 RETR-1 however has not been demonstrated (Preiss 2007), neither any of the  
97 other endogenous (nor exogenous) retroviral elements present in *C. elegans*  
98 genome. This work describes the identification of the ‘first –pass set’ of the  
99 potentially replication competent proviruses inserted into *C. elegans* genome  
100 present in both N2 (Bristol) and CB4856 (Hawaii) lines. The description is  
101 focused on the distinct and unique proviral insertion on the proximal arm of the  
102 chromosome IV identified by the reciprocal LTR match. This particular prediction  
103 distinctly embeds the orphan gene of *C.elegans* F58H7.5. Given the recent  
104 improvement in the genome engineering i.e. with the advancement in the  
105 CRISPR-Cas9 methods (Jinek et al. 2012) applicable to *C.elegans* (Friedland et  
106 al. 2013), I suggest the identified set might serve the practical and experimental  
107 purpose: the proviruses once inserted into the *C.elegans* genome in the  
108 evolutionary past could now be ablated (Yang et al. 2015).

109

110

111

112

113

114

115

116 Materials and methods:

117

118           Genebank-NCBI reference sequence of the prototype N2 (Bristol) *C.*  
119 *elegans* genome (*C. elegans* Sequencing Consortium 1998): Chr I  
120 NC\_003279.8, Chr II NC\_003280.10, Chr III NC\_003281.10, Chr IV  
121 NC\_003282.8, Chr V NC\_003283.11, Chr X NC\_003284.9 and Hawaiian isolate  
122 CB4856 (Thompson et al. 2015): I Chromosome CM003206.1, II Chromosome  
123 CM003207.1, III Chromosome CM003208.1, IV Chromosome CM003209.1, V  
124 Chromosome CM003210.1, X Chromosome CM003211.1.

125

126           *C. elegans* chromosome sequence assemblies were analyzed with LTR  
127 finder program (Zhao Xu, Hao Wang 2007) at default parameters with tRNA  
128 primer binding site predicted using *C. elegans* tRNA dataset, to detect individual  
129 flanking LTR pairs. The first-pass screening, focused on the predictions were at  
130 least one internal candidate reading frame were suggested by internally enabled  
131 ScanProsite. DNA sequences predicted by the LTR finder were conceptually  
132 translated into reading frames (<[molbiol.ru/eng/scripts/01\\_13.html](http://molbiol.ru/eng/scripts/01_13.html)>) resulting in  
133 strings of the one-letter amino-acid codes. Individual reading frames of coded  
134 amino-acid strings were masked for in-frame stop codons. Stop-masked amino-  
135 acid strings were analyzed with the external InterProScan search engine  
136 (<[www.ebi.ac.uk/Tools/pfa/iprscan/](http://www.ebi.ac.uk/Tools/pfa/iprscan/)> Zdobnov et al. 2001) for the retroviral  
137 domain detection and output was cross-verified with the output of the LTR finder.  
138 LTR identity in an isolate matched candidate predictions of the LTR pairs were

139 verified by the reciprocal sequence alignment (Altschul et al. 1990). Predicted  
140 reading frames were verified with analysis by taxon restricted homology search  
141 (either with the set of the NCBI reference sequence of the retro-transcribing  
142 viruses or endogenous retroviruses). Identified proviruses were displayed on  
143 Ensembl *C. elegans* N2(Bristol) database by BLAT (Kent 2002). The protein  
144 domains architectures ideograms and the pairwise LOGO alignments were  
145 drawn with MyDomains prosite (Hulo et al. 2008)  
146 (<[prosite.expasy.org/mydomains/](http://prosite.expasy.org/mydomains/)>) and Weblogo3 (Crooks et al. 2004,  
147 Schneider and Stephens 1990) (<[weblogo.threeplusone.com](http://weblogo.threeplusone.com)>) respectively. The  
148 genomic landscape surrounding the confirmed retroviral insertions was GBrowse  
149 (<[gbrowse.org](http://gbrowse.org)>) displayed at the WormBase website. Phylogenetic analysis on  
150 predicted retroviral domains was conducted with pipeline in ETE3 at  
151 (<[www.genome.jp](http://www.genome.jp)>). Alignment and phylogenetic reconstructions were  
152 performed using the function "build" of ETE3 v3.0.0b32 (Huerta-Cepas et al.,  
153 2016) as implemented on the GenomeNet (<[www.genome.jp/tools/ete/](http://www.genome.jp/tools/ete/)>). The  
154 compiled input files for reverse-transcriptase polymerase, RNaseH and integrase  
155 catalytic domain are given in the supplement files. Alignment was performed with  
156 MAFFT v6.861b with the default options (Kato and Standley, 2013). The initial  
157 tree was constructed using FastTree v2.1.8 with default parameters (Price et al.,  
158 2009). The ML bootstrapped trees were inferred either using RAxML v8.1.20 ran  
159 with model PROTGAMMAJTT and default parameters (Stamatakis, 2014) and  
160 PhyML v20160115 ran with model JTT and parameters: -f m --pinv e -o tlr --

161 nclasses 4 --bootstrap 100 --alpha e (Guindon et al., 2010). Branch supports  
162 were computed out of 100 iterations.

163

164

165

166 **Results:**

167

168         The details of the genome-scale analysis are included in materials and  
169 methods section and the results of the first pass screening are listed with (Table  
170 1. and Table 4.) and graphically outlined (Fig. 5), however, will be described  
171 elsewhere. Here, I describe the identification and analysis of the unusual provirus  
172 inserted in sense (+) orientation on Chromosome IV of both prototype N2(Bristol)  
173 strain and Hawaiian isolate CB4856. The provirus is found inserted at the  
174 proximal arm of IV at positions IV:912948..921658 and IV:899767..908485 of an N2  
175 and CB4856 respectively by the reciprocal match of the LTR pairs (Fig. 1.A. and  
176 B). The two extracted sequences (8711 bp and 8719 bp respectively) align  
177 precisely to ensembl N2(Bristol) assembly, with duplicate matches corresponding  
178 to long terminal repeats (Fig. 1. C.). This suggests the two elements identified at  
179 the proximal arm of the chromosome IV, might represent provirus inserted in the  
180 ancestral *C. elegans* lineage, which have independently diverged since the  
181 insertion time. To prove the identified provirus share a common ancestor, 1kb of  
182 immediately flanking the insertion sequence was extracted and aligned,  
183 confirming the 5' and 3' flanks were almost identical and have diverged



184 independently by four base substitution per thousand nucleotides (0.4%)  
185 (Supplement file.1. Alignment of the insertions with 1kb flanking sequence). The  
186 striking sequence conservation detected in the provirus flanking sequence  
187 between N2(Bristol) and CB4856, indicates the element once inserted into the  
188 genome of the ancestral *C. elegans* line, was inherited as a haplotypic block and  
189 presumably maintained in same location on chromosome IV in both isolates.

190  
191 **LTRs - Long Terminal Repeats** (Fig 1.A. and B. and supplement files). The  
192 LTRs are identical in length in both *C.elegans* isolates. N2(Bristol) 5'-LTR is  
193 located at IV:912,948 – 913,362 and 3'-LTR IV:921,244 – 921,658 and both  
194 LTRs are of same length 415 bp. Hawaii CB4856 5'-LTR is located on  
195 IV:899,767 – 900,181 and 3'-LTR IV:908071 – 908485 and both LTRs are of  
196 same length 415 bp (Supplement file 2. LTR alignment). Comparison between 5'  
197 LTRs and 3' LTRs in both isolates confirms the lack of divergent bases in the  
198 LTR alignment. Provided the accepted model of the retroviral replication  
199 (Telesnitsky A and Goff SP 1998) assumes the LTRs are identical at the insertion  
200 time, therefore the lack of divergence in the LTR sequences in both geographical  
201 isolates suggests that the identified insertion represent the recent evolutionary  
202 event.

203  
204 **PBS.** Primer Binding Sites (Fig 1.A. and B. and supplement files) are predicted  
205 by LTR finder as sequences immediately downstream (12nt) of 5' LTR matching  
206 the tRNA primer for the reverse transcription of viral RNA (Telesnitsky A and Goff

207 SP 1998). The LTR finder program identified the same iso-accepting methionyl  
208 (CAT) tRNA to bind conserved PBS [5'-TAGCTAGCGAGTGAACCGAATTTTCG]  
209 (IV:913,374 – 913,398) in the *C.elegans* N2(Bristol) insertion and Hawaiian  
210 CB4856 isolate (IV:900,193 – 900,217).

211

212 **PPT.** Poly Purine Tract sequence (Fig 1.A. and B. and supplement files)  
213 immediately proceeding the 3' LTR are identified by the LTR finder in both  
214 proviruses and are identical in two analyzed isolates [PPT: 5'-  
215 TCAAAAGGGGGGAGG] located at (IV:921,229 – 921,243) in the *C.elegans*  
216 N2(Bristol) insertion and (IV:908,056 – 908,070) Hawaiian CB4856 isolate.

217

218

219 The insertions of the provirus at the proximal arm of the chromosome IV,  
220 are almost identical in the overall length. The provirus in the reference N2(Bristol)  
221 assembly is 8,711 nt long and CB4856(Hawaii) is minimally longer 8, 719 nt  
222 (Table 1. and supplement file). Given the LTRs, are of identical length in both  
223 isolates and essentially lack any aberrant bases, the region between LTRs  
224 (coding for retroviral proteins) is expected to harbor divergent nucleotides  
225 accounting for the difference in the overall length. BLAT analysis indicates the  
226 two regions (Fig.1 C. indicated by the black arrowheads) interrupting the  
227 concordance of the alignment of the provirus variant found in chromosome IV in  
228 CB4856 and the reference N2 assembly. Those two regions are displayed in  
229 pairwise alignment (Supplement file 1.) and occur in region of provirus at bases

230 in range 5,00-5,57kb (Fig. 2) in a region connecting segments encoding for  
231 Reverse Transcriptase-RNaseH and catalytic integrase proteins. Compared  
232 regions in the reference assembly of an N2 and CB4856 assembly, identifies the  
233 following segments as inconsistent between isolates: 1. Four base deletion in N2  
234 (deletion flank GAC TTC----CGA CGC) or (ATGT) insertion in CB4856. 2. Three  
235 base insertion in N2 (insertion flank CTG GGT – TCG CCG) or (TGC) deletion in  
236 CB4856. 3. Seven base pair deletion in N2 (deletion flank AGT AGT----- ACA  
237 TGG) or (ATCATGA) insertion in CB4856, with G to T single base substitution in  
238 the left flank region. Collectively across the above 5,00-5,57kb region cumulative  
239 aberrant bases (including two substitutions not altering the length) contribute to  
240 the overall ~2,8% of divergence between two isolates.

241

242 As indicated in (Fig.1.A and 1.B), the provirus inserted into N2(Bristol) is  
243 assigned two retroviral domains (Reverse transcriptase RT- domain: at  
244 IV:916,714 – 917,250 and Integrase catalytic domain: IV:918,494 – 918,889) by  
245 the LTR finder internally enabled PrositeScan. In contrast, CB4856 inserted  
246 element is attributed with only one retroviral domain (Integrase catalytic domain:  
247 IV:905,294 – 905,716). Provided high level of the overall sequence conservation  
248 over the entire length of the insertion present in both isolates, that asymmetric  
249 display is somewhat unusual for the elements shared between N2 and CB4856.  
250 To address this discrepancy, the proviruses identified in N2 and CB4856, were  
251 subjected to analysis with external protein domain search the InterProScan.

252

253 **Predicted proviral proteins and protein domains.** Provirus IV-8711 in  
254 N2(Bristol) and IV-8719 in CB4856(Hawaii) exhibits organization of protein  
255 domains typical for endogenous retroviruses/retrotransposons (Fig.1.C). The  
256 protein domains predicted by the external InterProScan are presented as  
257 pairwise consensus LOGO alignment of particular N2/CB4856 protein domain  
258 pairs in (Fig.3.). The protein domains predicted by the external InterProScan  
259 sequence LOGO's are presented in 5'->3' order as they occur encoded in the  
260 provirus (Fig.3.A, gag; B. protease; C. RT polymerase; D. RNase H; E. integrase)  
261 with respect to predicted reading frames. The summarized InterProScan search  
262 results (below) demonstrate that the provirus identified in IV-8711 in N2(Bristol)  
263 and IV-8719 in CB4856(Hawaii) in overall genetic organization appears typical  
264 for the endogenous retroviruses. However an additional open reading frame is  
265 found in the IV-8711/IV-8719 provirus, encoded by the ORF present in the region  
266 between gene encoding the catalytic integrase protein and the 3'-LTR. This sub-  
267 3'-LTR localization is typical for the retroviral envelope protein (env), but provided  
268 the lack of the homology with retroviral env genes is termed below 3'-ORF and  
269 represent the uncharacterized *C. elegans* protein F58H7.5 (Fig 1.C).

270  
271 (i.) gag. Protein domain specifying the gag gene is defined by the Pfam protein  
272 domain signature match (PF03732/InterPro:IPR005162). Gag is encoded in the  
273 reading frame (+1) and is identical between IV-8711 in N2(Bristol) and IV-8719 in  
274 CB4856(Hawaii) proviruses (Fig.3.A). Protein domain encoding for gag is 95  
275 amino-acid residues long and encoded in positions: (1951-2235) in both isolates.

276

277 (ii.) pro. Protein domain specifying the Retroviral-type Aspartyl Protease gene is  
278 defined by the Pfam protein domain signature match (PF13650). Aspartyl protease  
279 is encoded in the reading frame (+1) and is identical between IV-8711 in  
280 N2(Bristol) and IV-8719 in CB4856(Hawaii) proviruses (Fig.3.B). Protein domain  
281 encoding for aspartyl protease is 95 amino-acid residues long and encoded in  
282 positions: (2791-3075) in both isolates.

283

284 (iii.) pol. Protein domain specifying the Reverse-transcriptase polymerase gene  
285 is defined by the ProSite protein domain signature match  
286 (PS50878/InterPro:IPR000477). Reverse-transcriptase polymerase is encoded in  
287 the reading frame (+2) and is not identical between IV-8711 in N2(Bristol) and IV-  
288 8719 in CB4856(Hawaii) proviruses (Fig.3.C). Protein domain encoding for  
289 aspartyl protease is 179 amino-acid residues long and encoded in positions:  
290 (3767-4303) in both isolates. Across the Reverse-transcriptase polymerase  
291 sequence there are three non-synonymous substitutions detected (positions 20  
292 and 54 altering I->V and position 126 M->T) diverged IV-8711 in N2(Bristol) and  
293 IV-8719 in CB4856(Hawaii) proviruses. In addition, the reference N2 sequence  
294 contains in-frame stop codon predicted in position 119, absent in CB4856,  
295 substituting for the serine in this position (Fig.3.C).

296

297 (iv.) RNaseH. Protein domain specifying the Retroviral RNaseH gene is defined  
298 by the CDD protein domain signature match (cd09274). RNaseH is encoded in  
299 the reading frame (+2) and is identical between IV-8711 in N2(Bristol) and IV-

300 8719 in CB4856(Hawaii) proviruses (Fig.3.D). RNaseH protein domain is 121  
301 amino-acid residues long and is encoded in positions: (4583-4954) in both  
302 isolates.

303  
304 (v.) int. Integrase catalytic domain. Protein domain specifying the catalytic  
305 integrase gene is defined by the ProSite protein domain signature match  
306 (PS50994/InterPro:IPR001584). Markedly the Integrase is encoded in the  
307 different reading frames: (+3) and (+2) frames are used in IV-8711 in N2(Bristol)  
308 and IV-8719 in CB4856(Hawaii) proviruses respectively (Fig.3.E) and (Table.2).  
309 This frame-shift is due to mutations listed in (Fig.2.3) and explains the lack of an  
310 alignment in N-terminal part of predicted integrase sequence, until the metionine  
311 residue in the position 32. Remaining part of the protein domain encoding for  
312 integrase is 130 amino-acid residues long and is identical between IV-8711 in  
313 N2(Bristol) and IV-8719 in CB4856(Hawaii) proviruses. Integrase catalytic  
314 domain is encoded in positions: (5457-5942) and (5465-5950) in IV-8711 in  
315 N2(Bristol) and in IV-8719 in CB4856(Hawaii) respectively.

316  
317 (vi.) 3'-ORF. 3'-ORF embeds an uncharacterized protein F58H7.5 predicted in  
318 chromosome IV of the reference sequence assembly of the *C. elegans* genome  
319 (Fig. 1. C). In the InterProScan search I used to improve the retroviral domain  
320 predictions, this unusual prediction is specified by the Phobius  
321 (<phobius.sbc.su.se>) protein topology match. 3'-ORF is encoded in the reading  
322 frame (+2) and (+1) in IV-8711 in N2(Bristol) and IV-8719 in CB4856(Hawaii)

323 proviruses (Fig.3.F) and (Table.2.) respectively. The 3'-ORF is defined by the  
324 F58H7.5 prediction. Predicted 3'-ORF embeds the F58H7.5 starting from position  
325 53 until 324, followed by the in-frame stop codon conserved in both isolates.  
326 Provided the F58H7.5 coding sequence is continuous (intronless gene) it is  
327 estimated it constitutes approximately 48,5% of the 3'-ORF. Within the F58H7.5  
328 sequence there are two non-synonymous substitutions detected (3'-ORF position  
329 87 H->P and 171 E->K) as divergent between IV-8711 in N2(Bristol) and IV-8719  
330 in CB4856(Hawaii) proviruses (Fig.3.F). 3'-ORF is encoded in positions: (6887-  
331 8563) and (6895-8571) in IV-8711 in N2(Bristol) and IV-8719 in CB4856(Hawaii)  
332 respectively. Remarkably F58H7.5 is an orphan gene, taxonomically restricted to  
333 *C. elegans* lineage. Conducted homology based search analysis indicates  
334 F58H7.5 is uniquely present within *C. elegans* species, and therefore absent  
335 from other caenorhabdids (including the sister species). This narrow taxonomic  
336 distribution of F58H7.5 homology is in the stark contrast with the other proviral  
337 frames encoding for the typical retroviral domains described above.

338  
339

340 **Comparison with RETR-1 (III: 8852597 - 8861482).** Provided we demonstrated IV-  
341 8711 in N2(Bristol) and IV-8719 in CB4856(Hawaii) proviruses, are 'identical-by-  
342 descent' and diverged only in non-LTR regions, we compared the isolate specific  
343 sequences to RETR-1 retrovirus (Britten 95). RETR-1 is distinctly detected by  
344 LTR finder (Table I), specifically in the N2(Bristol) Chromosome III sequence.  
345 This asymmetric display of the element is different from observed for IV-8711

346 and IV-8719 insertion, apparently present in both isolates. While the description  
347 and detailed analysis of the RETR-1 is behind the scope of this work (will be  
348 described elsewhere), I compared IV-8711 in N2(Bristol) and IV-8719 in  
349 CB4856(Hawaii) proviruses to asymmetric insertion of the RETR-1 inactivating  
350 the *plg-1* gene. RETR-1 (Table. 1) as displayed in N2(Bristol) chromosome III, is  
351 8.886 kb in length (with LTR finder predicted 5' and 3' LTR sequences 518 bp  
352 and 513 bp respectively). The particular reason of choosing the RETR-1 for the  
353 comparative analysis is that in contrast with most other LTR finder predicted  
354 retroviral insertions listed with (Table 1.), insertion into chromosome IV shared  
355 between N2 and CB4856 aligns significantly with BLAST analysis with relatively  
356 well characterized nematode endogenous retrovirus RETR-1. The overall domain  
357 architecture of the RETR-1 used for comparison is slightly different to what is  
358 described in the previous section concerning the IV-8711 in N2(Bristol) and IV-  
359 8719 in CB4856(Hawaii) proviruses. The InterProScan search on the coded, stop  
360 masked RETR-1 conceptual translation (described in materials and methods),  
361 revealed the all relevant features of the protein domain organization recognized  
362 other retroviruses, are grouped into frame (+1). This single (+1) frame of the  
363 RETR-1, is fairly long and apparently continuous (uninterrupted by the in-frame  
364 stop codons). InterProScan on the RETR-1 single frame (+1) identified regions  
365 encoding for conserved protein domains corresponding to reverse-transcriptase  
366 polymerase (PS50878/ InterPro:IPR000477), RNaseH (CDD: cd09274), and  
367 catalytic Integrase (PS50994/InterPro:IPR001584). In contrast, two additional  
368 protein domains typical for the retrovirus genome architecture, identified in the



369 provirus inserted into N2/CB4856 ancestral locus on chromosome IV, was not  
370 identified in the RETR-1 using the same search criteria. Notably Pfam protein  
371 domain signature matches (PF03732/InterPro:IPR005162) specifying gag gene  
372 and (PF13650) specifying retroviral-type Aspartyl Protease gene respectively, are  
373 apparently missing from (+1) long reading frame encoded by the RETR-1 (and  
374 remaining reading frames). Positively identified protein domain signature  
375 matches are compared in the Table.3 (Individual alignments are included in  
376 supplementary materials). This analysis demonstrates the 3'-ORF embedding  
377 F58H7.5 prediction is a unique and distinct part of the proviral insert in IV-8711 in  
378 N2(Bristol) and IV-8719 in CB4856(Hawaii), but consistently absent from the  
379 RETR-1 (and any other presently known reverse-transcribing agents (not  
380 shown)).

381

382

383 **Comparison with other reverse-transcribing viruses.** Given the original  
384 description and sequence analysis described in (Britten 1995) indicated the  
385 remarkable homology in the RT polymerase region of RETR-1 to Cauliflower  
386 Mosaic Virus (CaMV) RT (Table 1. in (Britten 1995)), we inferred that the  
387 insertion detected by LTR finder at the *C. elegans* chromosome IV (IV-8711 in  
388 N2 and IV-8719 in CB4856) represent related clan of endogenous retroviruses.  
389 The reason for that is the reverse transcriptase polymerase region predicted by  
390 the InterProScan in both IV-8711 in N2 and IV-8719 in CB4856 (Fig.3.C), aligns  
391 with the CaMV RT and reverse transcriptases of other Caulimoviruses (not

392 shown). Therefore, the reverse transcriptase-polymerase domain phylogenetic  
393 tree was build, using the predicted RT protein domains of retroviruses and other  
394 reverse-transcribing agents (Fig.4). Both reverse-transcriptase polymerase  
395 domain and RNaseH domain fast-tree cladograms of the reverse-transcribing  
396 agents, the Caulimoviruses are nested within IV-8711-IV-8719/RETR-1 group.  
397 Consistently, with two types of Maximum-Likelihood analysis (where RaxML and  
398 PhyML nodes are supported by a bootstrap (Efron et al. 1996)), Caulimoviruses  
399 are nested within the IV-8711-IV-8719/RETR-1 group. In particular, the reverse-  
400 transcriptase polymerase domain cladograms include the RT-polymerase domain  
401 predicted on HBV (Hepatitis B virus), which appear as an outgroup. The reverse-  
402 transcriptase polymerase domain cladograms place the retrovirus clade and IV-  
403 8711-IV-8719/RETR-1/Caulimovirus branch as sister taxa. The same relation is  
404 observed in the cladorograms build based on RNaseH domains, however here  
405 the outgroup root (HBV) is removed. Together in all examples provided (catalytic  
406 integrase domain tree is not relevant here, as Caulimoviruses in most cases  
407 maintain their DNA episomality (Hull et al. 1987) and thereof do not encode  
408 retroviral type integrase ) IV-8711-IV-8719/RETR-1 group is basal to  
409 Caulimovirus clade and therefore IV-8711-IV-8719/RETR-1 group appears as  
410 paraphyletic taxon with respect to pararetroviruses. This result seems suprising  
411 as Pararetroviruses existing in plants are currently grouped with Hepadnaviruses  
412 (Coffin et al. 1997).

413

414

415 Discussion:

416

417 Retroviral insertions into animal genomes are established metrics of  
418 dating the evolutionary time based on the LTR divergence. According to the  
419 retrovirus replication model (Coffin et al. 1997) accepted for the endogenous  
420 retroviruses and the LTR-retrotransposons, the LTRs are identical at the time of  
421 an insertion, than subsequently diverge, acquiring independent mutations at  
422 neutral rate. Examples of dating of the retroviral insertions and estimates of the  
423 evolutionary splits are available in the literature i.e. (Johnson and Coffin 1999)  
424 (Yohn et al. 2005) (Arnaud et al. 2007) (Jo et al. 2012) and are based on the  
425 calculations which in principle could be used and applied towards dating of  
426 retroviral insertions in *C. elegans* isolates. Those estimates could be useful in  
427 dating of the evolutionary split between the reference N2(Bristol) and Hawaiian  
428 isolates. In a given example, the conserved insertion pair of the IV-8711 in N2  
429 and IV-8719 in CB4856, diverged only minimally. Presented evidence concerning  
430 the divergence in the LTR region indicates the long terminal repeats in both  
431 isolates did not acquired any new mutations since a split from the prototype  
432 ancestral *C. elegans*. Therefore, I regard IV-8711 insertion represents the  
433 evolutionary recent event. According to the accepted model this suggests the  
434 split between N2(Bristol) and Hawaiian isolates could be estimated as  
435 remarkably recent, essentially behind the resolution power of the dating. On the  
436 other hand however, within the presented set of the retroviral insertions  
437 conserved between N2(Bristol) and Hawaiian isolates, there are examples which

438 contradict the above evolutionary scaling (data not shown). In few examples  
439 there is an evidence for LTR acquired mutations prior to split of N2(Bristol) and  
440 Hawaiian isolates. In those examples, the 5'- and 3'-LTRs diverged but the  
441 particular substitution is same in both isolates. The presence of this class of  
442 substitutions conserved in both isolates, suggest some of the insertions into  
443 prototype *C. elegans* genome have persisted for sufficient time in the ancestral  
444 *C. elegans* line to permit for the LTR divergence prior to split of an N2 and  
445 CB4856. Provided the alternative estimates for the split of N2 and Hawaii have  
446 been proposed (Thomas et al. 2015), I suggest those might need to be revised or  
447 rescaled using the metrics based on the LTR divergence. While detailed follow  
448 up analysis on those particular examples is emerging, it however remains behind  
449 the scope of this description.

451         The architecture of the unusual 3'-ORF embedding the F58H7.5 is  
452 described in the results section. F58H7.5 is an uncharacterized *C. elegans* gene  
453 of presently unknown function encoding for an novel protein. Based on the  
454 homology searches it seems the F58H7.5 is a distinct and unique, taxon  
455 restricted, species specific, orphan gene. The above orphan gene assignment is  
456 for the following rationale: F58H7.5 predicted protein is not associated with any  
457 of the known protein families represented in *C. elegans* neither elsewhere in the  
458 taxonomy tree. Homology based search on predicted protein F58H7.5 indicates  
459 no informative homologies in other caenorhabdids neither the sister species *C.*



481

482           The insertion of the retrovirus presently located on chromosome IV-8711  
483 in N2 and IV-8719 in CB4856, represent the example of the ancestral retroviral  
484 infection contrasting the RETR-1 insertion on chromosome III. While both IV-  
485 8711/IV-8719 and RETR-1 share the protein domains typical for the organization  
486 of endogenous retrovirus genome, the RETR-1 display in the LTR finder analysis  
487 is polar i.e. RETR-1 is detected explicitly in N2(Bristol) but missing from  
488 CB4856(Hawaii) (Table.1. and author's analysis. Not shown.). RETR-1 was  
489 identified by *C. elegans* genome sequence analysis (Sulson and Waterston  
490 1998) and is inserted into chromosome III of the reference N2 (spanning the  
491 clone border F44E2/PAR3 Alan Coulson pers communication 1997). In the N2  
492 reference sequence the RETR-1 is regarded transcriptionally active in germline  
493 and embryonic tissues, as judged by multiple ESTs sequences and *in situ*  
494 hybridization (Yuji Kohara, personal communication 1997, and NEXTdb pattern  
495 <nematode.lab.nig.ac.jp/db2/ShowCloneInfo.php?clone=88f8>). Others (Maydan  
496 et al. 2007 and Maydan et al. 2010) have found by comparative genomic  
497 hybridization that N2 RETR-1 locus is polymorphic (with large deletion spanning  
498 the RETR-1 insertion site in N2) when compared to CB4856. Consistently,  
499 (Papoli et al. 2008) demonstrated that RETR-1 is inserted into F44E2.11 in N2  
500 and concluded is absent from plg-1(+) CB4856. Those findings are in the  
501 substantial agreement with the results presented here (Table 1.). First RETR-1 is  
502 accurately predicted by the LTR finder and served as positive control in the  
503 genome-scale search. Second major retroviral protein domains predicted in the

504 stop-masked frames of the ancestral retroviral element inserted on chromosome  
505 IV, appear conserved with domains predicted on the RETR-1, including reverse-  
506 transcriptase, RNaseH and catalytic integrase. The presented results however  
507 demonstrate, that comparing the gag gene region predicted consistently on the  
508 stop-masked frame (+1) the IV-8711 in N2 and IV-8719 in CB4856 is absent from  
509 RETR-1 (by direct comparison and by *de novo* InterProScan analysis). This rise  
510 the possibility that gag gene in the RETR-1 (III) element is either rearranged  
511 (deleted) or diverged significantly from other members of the clade, to sufficient  
512 degree to prevent detection. Indeed the rearrangements appear common among  
513 endogenous retroviral insertions (authors unpublished observation). In this  
514 perspective the RETR-1 often regarded as 'active' (the original communication of  
515 (Britten 1995) but also by (Dennis et al. 2012) who tackled the RETR-1  
516 experimentally), might in the fact represent immobile (albeit transcriptionally  
517 active) insertion into *plg-1* gene. Third, considering the evolutionary scale since  
518 the insertion of into the locus on chromosome IV present in both N2 and Hawaii  
519 isolates and RETR-1, it appears the later element was inserted into the N2  
520 genome after the split of the Hawaii from the ancestral *C. elegans* line. While this  
521 model would possibly explain the polar distribution of the RETR-1 (and possibly  
522 some other elements detected discretely in the N2 (Table.1.) but not in CB4856),  
523 the results of the LTR alignments appear to contradict this perspective. As  
524 mentioned above the 5' and 3' LTRs in the elements present in the IV-8711 in N2  
525 and IV-8719 in CB4856, are identical. In contrast the 5' and 3' LTRs predicted by  
526 the LTR finder on the RETR-1 are different in length (518 and 513 bp

527 respectively (Table 1.), suggesting the insertion or deletion must have occurred)  
528 and clearly acquired aberrant bases (>10 aberrant bases between 5' and 3' LTR)  
529 at the 3' end, since the time insertion. Importantly, the LTR finder predicts so  
530 called TSR (Target Site Repeats, short duplicated sequences of the host at the  
531 integration site), implicated to occur by the accepted retroviral integration model  
532 (Brown 1997) adjacent to RETR-1 insertion site [TSR: CGACTA]. The presence  
533 of the TSRs flanking the RETR-1 insertion site might rule-out the inaccurate  
534 prediction of LTRs. Considering, the observed divergence rate of the LTRs in the  
535 RETR-1 and the divergence rate of the LTRs present in IV-8711 in N2 and in IV-  
536 8719 in CB4856, those findings appear contradictory, if the neutral substitution  
537 model of the LTRs divergence is assumed. This inconsistency might be due to  
538 selective pressure on some endogenous retroviral insertions loci (i.e. serving as  
539 the host restriction factors) or the effects of the negative selection (i.e. if the  
540 insertion results in the trait affecting the overall fitness of the carrier) or perhaps  
541 for some other reasons. This note however should serve as the word of caution,  
542 considering the long distance evolutionary extrapolations based on the single  
543 isolated example (given the examples supporting other evolutionary scenarios  
544 could be drawn out of the examples given in (Table.1.). Those examples will be  
545 discussed elsewhere).

546

547 Phylogenetic reconstructions of the predicted retroviral protein domains. The  
548 intimate kinship established for the ancestral *C. elegans* provirus IV-8711 in N2  
549 and in IV-8719 in CB4856 and RETR-1(III) is further supported by the



550 phylogenetic reconstructions. Based on the reverse-transcriptase polymerase  
551 domain cladograms of the retro-transcribing viral agents, IV-8711-IV-8719/RETR-  
552 1 like elements appear as paraphyletic group with Caulimovirus clade.  
553 Cladograms establish the sister relationship between retrovirus clade and  
554 caulimovirus/IV-8711-IV-8719/RETR-1. The above grouping is supported by  
555 placement of the RT-polymerase domain predicted independently in genomes of  
556 seven different Caulimoviruses and seven different retroviruses (representing  
557 major branches in animal retrovirus taxonomy) respectively, in addition to five  
558 members of the IV-8711-IV-8719/RETR-1 group. It appears even more striking  
559 as the same phylogenetic kinship is supported by the RNaseH domain  
560 cladograms. [In contrast to cladograms build based on RT-polymerase domain  
561 (when single defined domain PS50878/ InterPro:IPR000477 is predicted on all  
562 genomes included into tree) RNaseH domain is predicted either as RNaseH  
563 (PS50879 RNASE\_H domain, found typically in the vertebrate retroviruses) or  
564 RNaseHI ([cd09274](#) RNase\_HI\_RT\_Ty3 found in the invertebrate retroviruses  
565 including the group of IV-8711-IV-8719/RETR-1), while both types of the RNaseH  
566 domain are identified in Caulimoviruses. Provided the IV-8711-IV-8719/RETR-1  
567 group contains elements infecting nematodes and insects (and other retroviruses  
568 that are associated with invertebrates other than insects and nematodes,  
569 unpublished observation) the grouping with Caulimoviruses is surprising given  
570 the later are found exclusively infecting plants. Curiously, the association  
571 between described provirus inserted into chromosome IV and Caulimoviruses,  
572 extends beyond the homology found in the polymerase domain. Insertion into

573 chromosome IV-8711 in N2 and IV-8719 is predicted by the LTR finder to utilize  
574 the methionyl-tRNA as a primer for reverse transcription reaction. This coincides  
575 with the tRNA preference described for Caulimoviruses (Hull et al. 1987), despite  
576 the overall differences in the genome replication via reverse transcription  
577 (however this Methionyl-tRNA bias remains speculative, as is based solely on the  
578 computational prediction and thereof requires the experimental verification).  
579 Regarding the above findings in the perspective concerning the scope of this  
580 description, it needs to be emphasized, that while the above phylogenetic  
581 reconstructions robustly confirm the identified region of the *C.elegans* genome  
582 represents the inserted endogenous retrovirus, the phylogenetic tools can not be  
583 applied efficiently towards the identified 3'-ORF embedding the F58H7.5 gene.  
584 This is because (as noted above) the F58H7.5 is an orphan gene, taxonomically  
585 restricted to *C. elegans* lineage, precluding the cross-taxa comparisons. The  
586 variant of the F58H7.5 identified in CB4856 (result section Fig. 3.F) is than the  
587 first known and constitutes the only prediction available for the phylogenetic  
588 comparisons.

589  
590         Considering the presented results in the genome-scale perspective, the  
591 work focuses on the single example of the past infection of the *C. elegans* by the  
592 retrovirus, represented as an insertion on the proximal arm of the chromosome  
593 IV present in two modern geographical isolates. As mentioned in the initial  
594 sentence of the results section, the detailed results of the genome scale analysis  
595 are out of the scope of this description and will be described elsewhere. *C.*

596 *elegans* genome was analyzed with the LTR finder program and the combined  
597 results are outlined in (Fig.5) and summarized in (Table 4.). In total LTR finder  
598 predicted 567 and 588 candidate loci in the N2(Bristol) and CB4856(Hawaii)  
599 respectively. Of above only fourteen predictions are listed in (Table 1.) where  
600 thirteen was verified as retroviral insertions. Would there be many more  
601 endogenous retrovirus insertions demanding the description ? While genome-  
602 scale searches in *C. elegans* for the endogenous retroviruses, where attempted  
603 by others (reviewed in (Bessereau 2006)) for various reasons, the entire picture  
604 remains blurred. There is an instructive example included into (Table 1.) of  
605 another provirus inherited from the ancestral *C. elegans* : the X inserted element  
606 X-12435. This particular element is predicted on both N2 and CB4856 genomes  
607 by the LTR finder by the reciprocal LTR match. However, in given case LTR  
608 finder internally enabled ScanProsite detects the retroviral domain only on the  
609 proviral locus in N2(Bristol) chromosome X but ignores the domain encoded by  
610 the orthologous locus on CB4856(Hawaii) X. While the reasons for this behavior  
611 remains largely enigmatic (i.e. it is formally possible that the domain encoding  
612 sequences deteriorated enough to prevent the detection by the internally enabled  
613 ScanProsite) this example suggests, there might be other proviral insertions  
614 where support by the internally enabled ScanProsite is insufficient to detect the  
615 protein domains supporting the search. To compensate for that insufficiency, I  
616 propose, the frame-wise protein domain search would be enabled externally on  
617 the conceptually translated, coded and stop-masked amino-acid strings. The  
618 presented evidence implies, the implemented stop-masking offers the

619 improvement detecting the endogenous retroviruses insertions with InterProScan  
620 search coupled with the LTR finder output. I further suggest, the stop-masking  
621 approach implemented here, could be easily generalized into genome scale  
622 analysis, with the following assumption: i. sequence of the entire chromosomes is  
623 frame-wise translated into amino-acid coded strings, ii. coded amino-acid strings  
624 are than stop-masked and searched for the co-occurring adjacent retroviral  
625 domains indicative for the insertion of the provirus iii. the possible LTR pairs are  
626 verified by the LTR finder.

627

628

629

630 Literature cited:

631

632 Arnaud, F., Caporale, M., Varela, M., Biek, R., Chessa, B., Alberti, A., ...

633 Palmarini, M. (2007). A Paradigm for Virus–Host Coevolution: Sequential

634 Counter-Adaptations between Endogenous and Exogenous Retroviruses. PLoS

635 Pathogens, 3(11), e170. doi.org/10.1371/journal.ppat.0030170

636

637 Baltimore D. RNA-dependent DNA polymerase in virions of RNA tumour viruses.

638 Nature. 1970 Jun 27;226(5252):1209-11.

639

640 Bittner JJ. SOME POSSIBLE EFFECTS OF NURSING ON THE MAMMARY

641 GLAND TUMOR INCIDENCE IN MICE. Science. 1936 Aug 14;84(2172):162.

642

643 Britten, R. J. (1995). Active gypsy/Ty3 retrotransposons or retroviruses in  
644 *Caenorhabditis elegans*. Proceedings of the National Academy of Sciences of  
645 the United States of America, 92(2), 599–601.

646

647 Bessereau JL. Transposons in *C. elegans*. 2006 Jan 18. In: WormBook: The  
648 Online Review of *C. elegans* Biology [Internet]. Pasadena (CA): WormBook;  
649 2005-.

650

651 Brown PO. Integration. In: Coffin JM, Hughes SH, Varmus HE, editors.  
652 Retroviruses. Cold Spring Harbor (NY): Cold Spring Harbor Laboratory Press;  
653 1997.

654

655 Coffin JM, Hughes SH, Varmus HE, editors. Retroviruses. Cold Spring Harbor  
656 (NY): Cold Spring Harbor Laboratory Press; 1997.

657

658 Efron, B., Halloran, E., & Holmes, S. (1996). Bootstrap confidence levels for  
659 phylogenetic trees. Proceedings of the National Academy of Sciences of the  
660 United States of America, 93(23), 13429.

661

662 Friedland, A. E., Tzur, Y. B., Esvelt, K. M., Colaiácovo, M. P., Church, G. M., &  
663 Calarco, J. A. (2013). Heritable genome editing in *C. elegans* via a CRISPR-  
664 Cas9 system. Nature Methods, 10(8), 741–743. doi.org/10.1038/nmeth.2532

665

666 Guindon S, Dufayard JF, Lefort V, Anisimova M, Hordijk W, Gascuel O.  
667 New algorithms and methods to estimate maximum-likelihood phylogenies:  
668 assessing the performance of PhyML 3.0. Syst Biol. 2010 May;59(3):307-21. doi:  
669 10.1093/sysbio/syq010.

670  
671 Hodgkin J and Doniach T. Natural Variation and Copulatory Plug Formation in  
672 *Caenorhabditis elegans*. Genetics 1995 May; 146: 149-164

673  
674  
675 Huerta-Cepas, J., Serra, F., & Bork, P. (2016). ETE 3: Reconstruction, Analysis,  
676 and Visualization of Phylogenomic Data. Molecular Biology and Evolution, 33(6),  
677 1635–1638. <http://doi.org/10.1093/molbev/msw046>

678  
679 Hull R, Covey SN, Maule AJ. Structure and replication of caulimovirus genomes.  
680 J Cell Sci Suppl. 1987;7:213-29.

681  
682 Jinek M, Chylinski K, Fonfara I, Hauer M, Doudna JA, Charpentier E. A  
683 programmable dual-RNA-guided DNA endonuclease in adaptive bacterial  
684 immunity. Science. 2012 Aug 17;337(6096):816-21. doi:  
685 10.1126/science.1225829.

686

687 Jo H, Choi H, Choi MK, Song N, Kim JH, Oh JW, Seo K, Seo HG, Chun T, Kim  
688 TH, Park C. Identification and classification of endogenous retroviruses in the  
689 canine genome using degenerative PCR and in-silico data analysis.

690 *Virology*. 2012 Jan 20;422(2):195-204. doi: 10.1016/j.virol.2011.10.010.

691

692 Johnson, W. E., & Coffin, J. M. (1999). Constructing primate phylogenies from  
693 ancient retrovirus sequences. *Proceedings of the National Academy of Sciences*  
694 *of the United States of America*, 96(18), 10254–10260.

695

696 Maydan, J. S., Flibotte, S., Edgley, M. L., Lau, J., Selzer, R. R., Richmond, T. A.,  
697 Pofahl, N. J., Thomas, J. H., & Moerman, D. G. (2007). Efficient high-resolution  
698 deletion discovery in *Caenorhabditis elegans* by array comparative genomic  
699 hybridization. *Genome Res*, 17, 337-47. doi:10.1101/gr.5690307

700

701 Jason S Maydan, Adam Lorch, Mark L Edgley, Stephane Flibotte, Donald G  
702 Moerman. Copy number variation in the genomes of twelve natural isolates of  
703 *Caenorhabditis elegans*. *BMC Genomics*. 2010; 11: 62. Published online 2010  
704 Jan 25. doi: 10.1186/1471-2164-11-62

705

706 Palopoli MF, Rockman MV, TinMaung A, Ramsay C, Curwen S, Aduna A, Laurita  
707 J, Kruglyak L. Molecular basis of the copulatory plug polymorphism in  
708 *Caenorhabditis elegans*. *Nature*. 2008 Aug 21;454(7207):1019-22. doi:  
709 10.1038/nature07171. Epub 2008 Jul 16.

710

711 Price, M. N., Dehal, P. S., & Arkin, A. P. (2009). FastTree: Computing Large  
712 Minimum Evolution Trees with Profiles instead of a Distance Matrix. *Molecular*  
713 *Biology and Evolution*, 26(7), 1641–1650. <http://doi.org/10.1093/molbev/msp077>

714

715 Rous, P. (1911). A SARCOMA OF THE FOWL TRANSMISSIBLE BY AN AGENT  
716 SEPARABLE FROM THE TUMOR CELLS. *The Journal of Experimental*  
717 *Medicine*, 13(4), 397–411.

718

719 Spector, D. H., Varmus, H. E., & Bishop, J. M. (1978). Nucleotide sequences  
720 related to the transforming gene of avian sarcoma virus are present in DNA of  
721 uninfected vertebrates. *Proceedings of the National Academy of Sciences of the*  
722 *United States of America*, 75(9), 4102–4106.

723

724 Stamatakis, A. (2014). RAxML version 8: a tool for phylogenetic analysis and  
725 post-analysis of large phylogenies. *Bioinformatics*, 30(9), 1312–1313.  
726 <http://doi.org/10.1093/bioinformatics/btu033>

727

728 Stoye, J. P., & Coffin, J. M. (1987). The four classes of endogenous murine  
729 leukemia virus: structural relationships and potential for recombination. *Journal of*  
730 *Virology*, 61(9), 2659–2669.

731



732 Sulson, J.E. and Waterston, R. et al. C. elegans Sequencing Consortium. Genome  
733 sequence of the nematode C. elegans: a platform for investigating biology.  
734 Science. 1998 Dec 11;282(5396):2012-8.

735

736 Telesnitsky A, Goff SP. Reverse Transcriptase and the Generation of Retroviral  
737 DNA. In: Coffin JM, Hughes SH, Varmus HE, editors. Retroviruses. Cold Spring  
738 Harbor (NY): Cold Spring Harbor Laboratory Press; 1997. ('Fig.2. Process of  
739 reverse transcription of the retroviral genome'. The accepted model of the  
740 retroviral reverse transcription and replication).

741

742 Temin HM, Mizutani S. RNA-dependent DNA polymerase in virions of Rous  
743 sarcoma virus. Nature. 1970 Jun 27;226(5252):1211-3.

744

745 Thomas, C. G., Wang, W., Jovelin, R., Ghosh, R., Lomasko, T., Trinh, Q., ...  
746 Cutter, A. D. (2015). Full-genome evolutionary histories of selfing, splitting, and  
747 selection in *Caenorhabditis*. *Genome Research*, 25(5), 667–678.  
748 [doi.org/10.1101/gr.187237.114](https://doi.org/10.1101/gr.187237.114)

749

750 Thompson OA, Snoek LB, Nijveen H, Sterken MG, Volkers RJ, Brenchley R,  
751 Van't Hof A, Bevers RP, Cossins AR, Yanai I, Hajnal A, Schmid T, Perkins JD,  
752 Spencer D, Kruglyak L, Andersen EC, Moerman DG, Hillier LW, Kammenga JE,  
753 Waterston RH. Remarkably Divergent Regions Punctuate the Genome Assembly

754 of the *Caenorhabditis elegans* Hawaiian Strain CB4856. *Genetics*. 2015  
755 Jul;200(3):975-89. doi: 10.1534  
756  
757 Yang L, Güell M, Niu D, George H, Lesha E, Grishin D, Aach J, Shrock E, Xu W,  
758 Poci J, Cortazio R, Wilkinson RA, Fishman JA, Church G. Genome-wide  
759 inactivation of porcine endogenous retroviruses (PERVs). *Science*. 2015 Nov  
760 27;350(6264):1101-4. doi: 10.1126  
761  
762 Yohn, C. T., Jiang, Z., McGrath, S. D., Hayden, K. E., Khaitovich, P., Johnson,  
763 M. E., ... Eichler, E. E. (2005). Lineage-Specific Expansions of Retroviral  
764 Insertions within the Genomes of African Great Apes but Not Humans and  
765 Orangutans. *PLoS Biology*, 3(4), e110. doi.org/10.1371/journal.pbio.0030110  
766  
767 Zdobnov EM, Apweiler R. *Bioinformatics*, 2001 Sep;17(9):847-8. InterProScan--  
768 an integration platform for the signature-recognition methods in InterPro.  
769  
770 Zhao Xu, Hao Wang, "LTR\_FINDER: an efficient tool for the prediction of full-  
771 length LTR retrotransposons", *Nucleic Acids Res*. 2007 July; 35(Web Server  
772 issue): W265-W268.  
773  
774 Other references for the sequence search tools:  
775  
776

ScanProsite (stand-alone tool to scan PROSITE) De Castro E, Sigrist CJA, Gattiker A, Bulliard V, Langendijk-Genevaux PS, Gasteiger E, Bairoch A, Hulo N.

*ScanProsite: detection of PROSITE signature matches and ProRule-associated functional and structural residues in proteins.*

Nucleic Acids Res. 2006 Jul 1;34(Web Server issue):W362-5.

MyDomains Hulo N, Bairoch A, Bulliard V, Cerutti L, Cuče BA, de Castro E, Lachaize C, Langendijk-Genevaux PS, Sigrist CJA.

*The 20 years of PROSITE.*

Nucleic Acids Res. 2008 Jan;36(Database issue):D245-9.

BLAT Kent WJ. BLAT--the BLAST-like alignment tool. Genome Res. 2002 Apr;12(4):656-64.

BLAST Altschul, S.F., Gish, W., Miller, W., Myers, E.W. & Lipman, D.J. (1990) "Basic local alignment search tool." J. Mol. Biol. 215:403-410.

WebLogo3 Crooks GE, Hon G, Chandonia JM, Brenner SE

WebLogo: A sequence logo generator, *Genome Research*, 14:1188-1190, (2004) [ Full Text ]

Schneider TD, Stephens RM. 1990. Sequence Logos: A New Way to Display Consensus Sequences. *Nucleic Acids Res.* 18:6097-6100

MAFFT

Katoh K, Standley DM. MAFFT multiple sequence alignment software version 7: improvements in performance and usability.

*Mol Biol Evol.* 2013 Apr;30(4):772-80. doi: 10.1093/molbev/mst010. Epub 2013 Jan 16.

777

778

779

780

781

782

783

784

785

786

787

788 Tables and Figures:

789

790

791 Figure 1. LTR finder graphics representing predicted provirus on the proximal arm of the  
792 chromosome IV in N2 (A.), and CB4658 (B.) Blue oval represents conserved PBS and yellow oval  
793 represents conserved PPT. Note RT and Integrase domains are predicted in N2 (A.) but only  
794 integrase domain is detected in CB4856 (B.). Ensembl representation (C.) of BLAT alignment of  
795 provirus sequences N2 (upper panel), and CB4658 (lower panel) with imposed Prosite Domain  
796 architectures (415 bp LTRs are drawn as blue rectangles) scaled onto Ensembl BLAT images  
797 (above the track with %GC content). The red horizontal bars represent BLAT alignments,  
798 expectedly duplicated at the 5' and 3' LTR regions (upper panel). Additional BLAT match is  
799 apparent with IV-8711 provirus of an N2 aligned with chromosome IV assembly of CB4856 (lower  
800 panel). The extra bar represents non-continuous alignments in the RNaseH – integrase  
801 connecting region (indicated by black arrowheads). Note the 3' region of the non-continuous  
802 alignment overlaps with N-terminal region of the predicted integrase (see Fig. 2 for details).  
803 F58H7.5 is apparent in both panels in the sector describing protein coding genes annotated in the  
804 reference sequence assembly. Provided the ideograms are drawn up to scale F58H7.5 projects  
805 on the 3' sub-LTR region of the predicted provirus.

806

807

A.

Fig: +2K-IV-8711

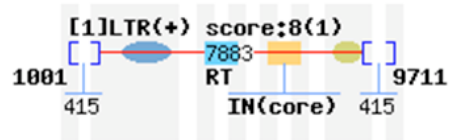

B.

Fig: +2K-IV-8719

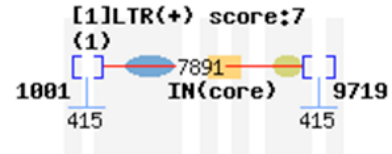

C.

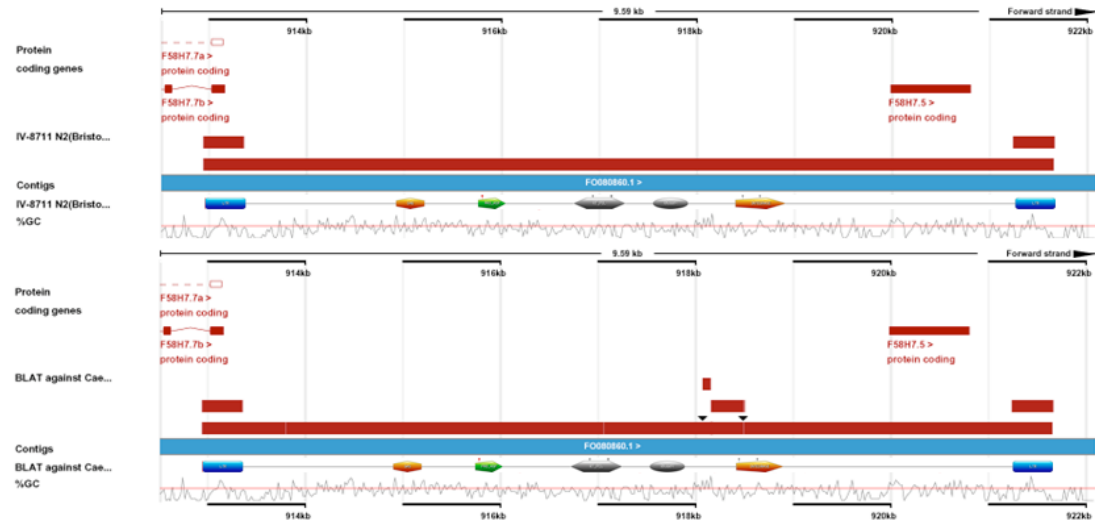

808

809

810

811

812

813

814

815

816

817

818

819

820 Figure 2. Insertions and / or deletions in the region connecting the RNaseH and catalytic  
 821 integrase domain encoding region of IV-8711 in N2(Bristol) and IV-8719 in CB4856(Hawaii). The  
 822 frame altering (3.A.) lesion overlaps with region encoding for the predicted N-terminal catalytic  
 823 integrase domain (outlined in Fig.1.D.) . Residues corresponding to N-terminal catalytic integrase  
 824 domain alignment start are underlined (3.B). Note the non-synonymous substitution (T->G) in N2  
 825 sequence introduces the amber stop codon.

826  
 827

828

829 1.

830 N2 5101 GATCCGATCCTGAAATGCATCAAGGACTTC----CGACGCCAGCAACGCCGATCGACATC 5156

831 Hii5101 .....ATGT..... 5160

832

833 2.

834 N2 5157 GTTCCTTCGACATGGGCAGGTGTGCTGGAGCACATCAAGCTTACTGAGTCTGGGTTGCTC 5216

835 Hii5161 .....--... 5217

836

837 3.A.

838 N2 5517 CTGAGAATGACAGCTTCAGGTAACAAGTAGT-----ACATGGTTTGTGGTTCACAAA 5569

839 Hii5518 .....T.ATCATGA..... 5577

840

841 3.B. Codon alignment over the N-terminal integrase: N2 (top) CB4856 (bottom)

842 N2 +3fr: .....A·S·G·N·K·\*-----Y·M·V·C·W·F·T·K

843 N2 5517 CTGAGAATGACAGCTTCAGGTAACAAGTAGT-----ACATGGTTTGTGGTTCACAAA 5569

844 Hii5518 .....T.ATCATGA..... 5577

845 Hii+2fr: .....L·Q·V·T·S·I·I·M·N·M·V·C·W·F·T·K

846

847

848

849

850

851

852

853

854

855 Figure. 3. Frame-wise LOGO alignments of the predicted protein domains on proviral insertions  
856 on the proximal arm of the chromosome IV present in two *C. elegans* isolates: IV-8711 N2(Bristol)  
857 and IV-8719(Hawaii). Group specific antigen gene (gag) (A.); Aspartyl protease (pro) (B.);  
858 Reverse-transcriptase polymerase (pol) (C.); RnaseH (D.); Catalytic integrase (int)(E.); 3'-ORF  
859 {F58H7.5} (F.). Stop codons are indicated by (\*). Black arrows indicate the start and end of the  
860 F58H7.5 coding region embedded into the 3'-ORF sequence.

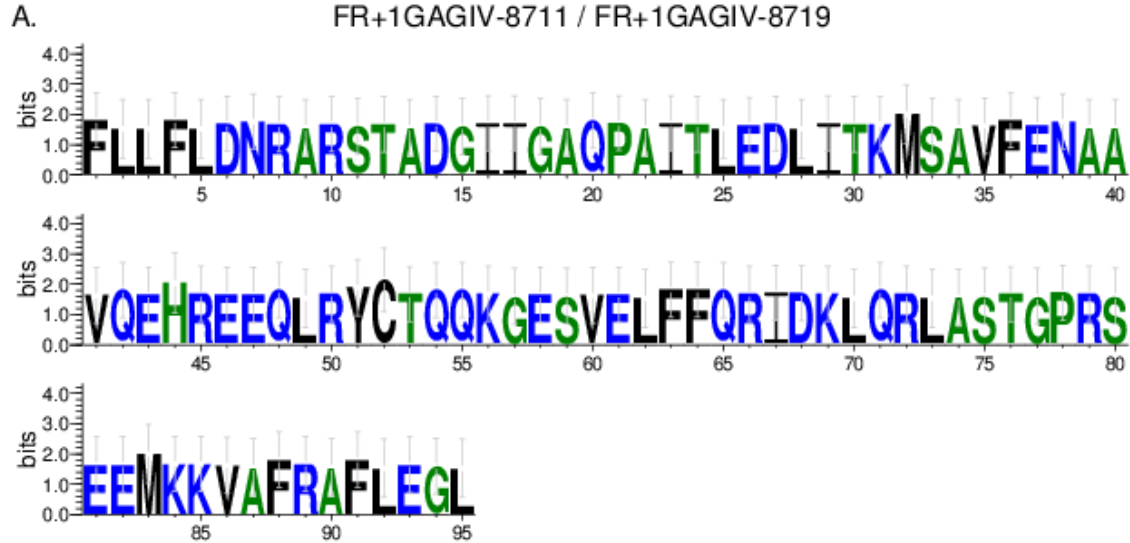

861

862

863

864

865



866

867

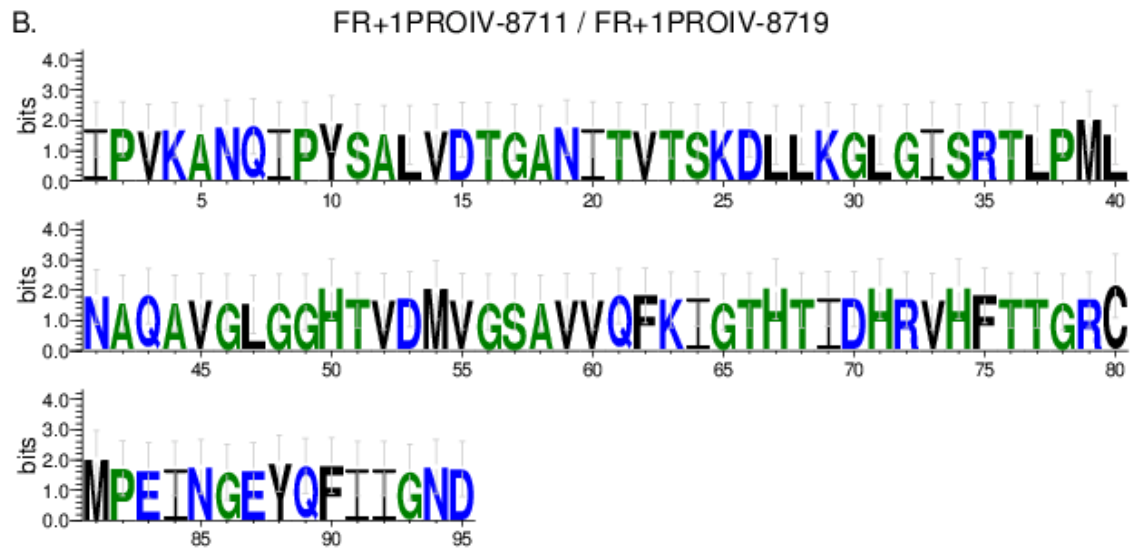

869

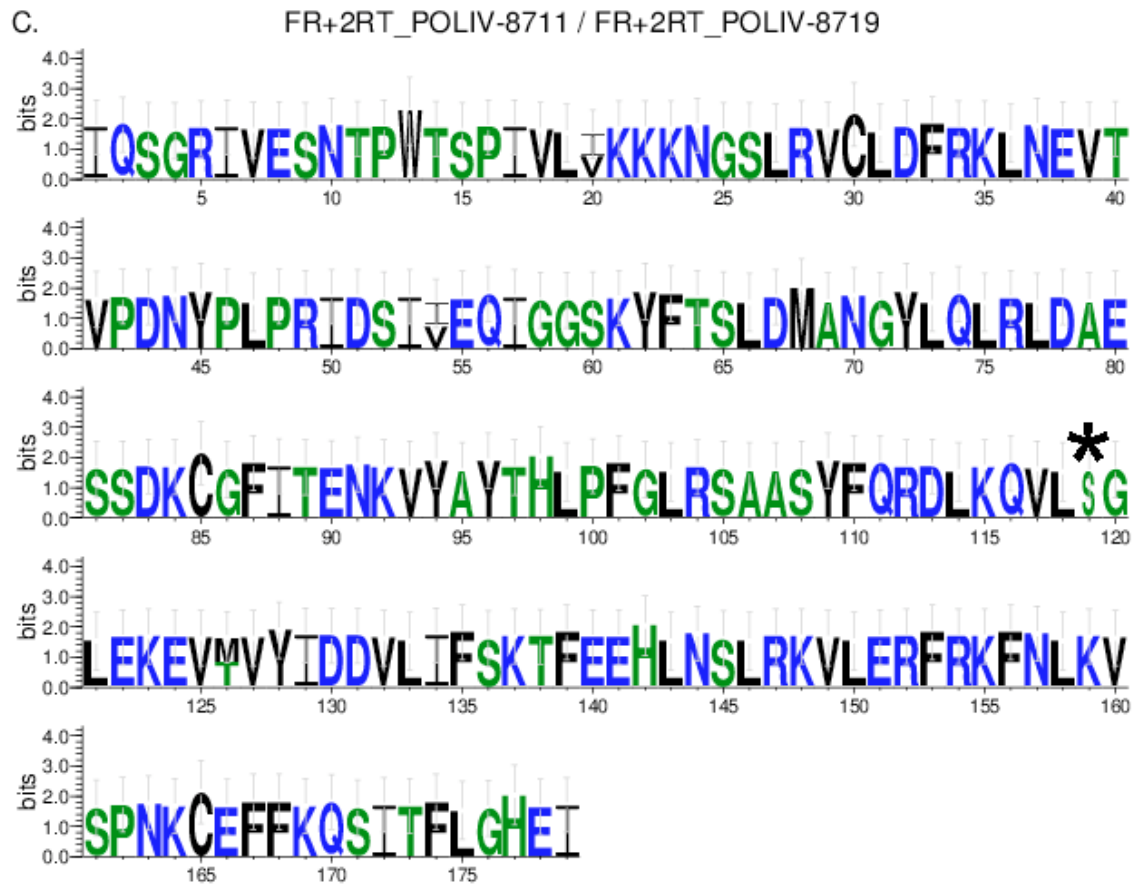

871

872

873

874

875

876

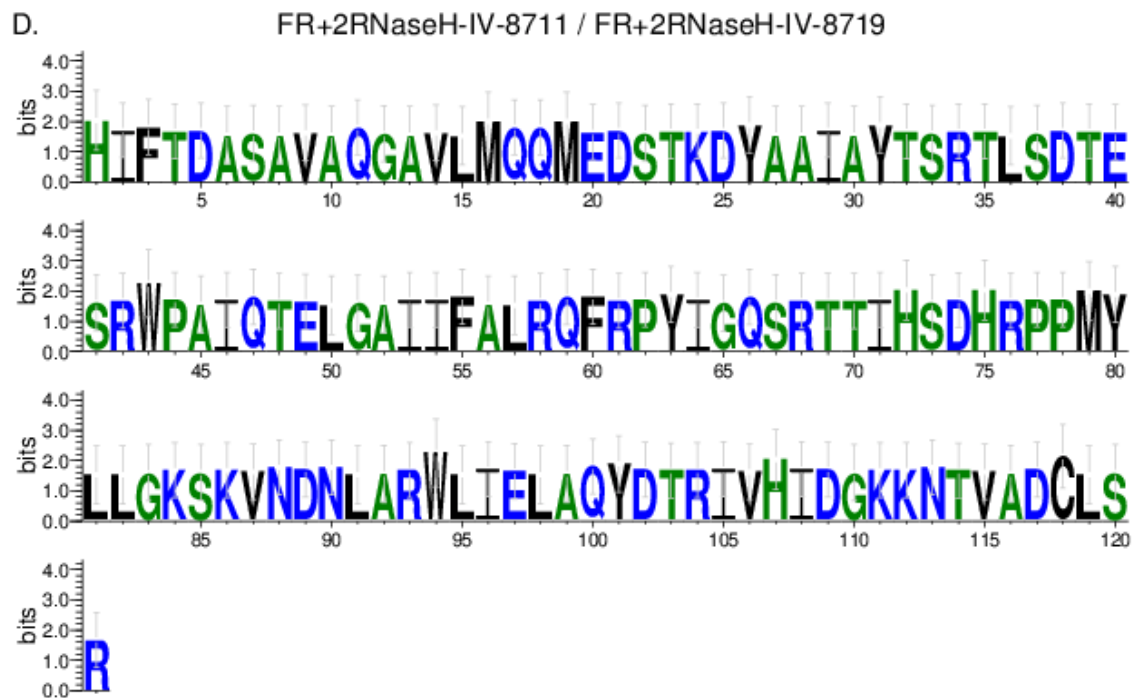

877

WebLogo 3.5.0

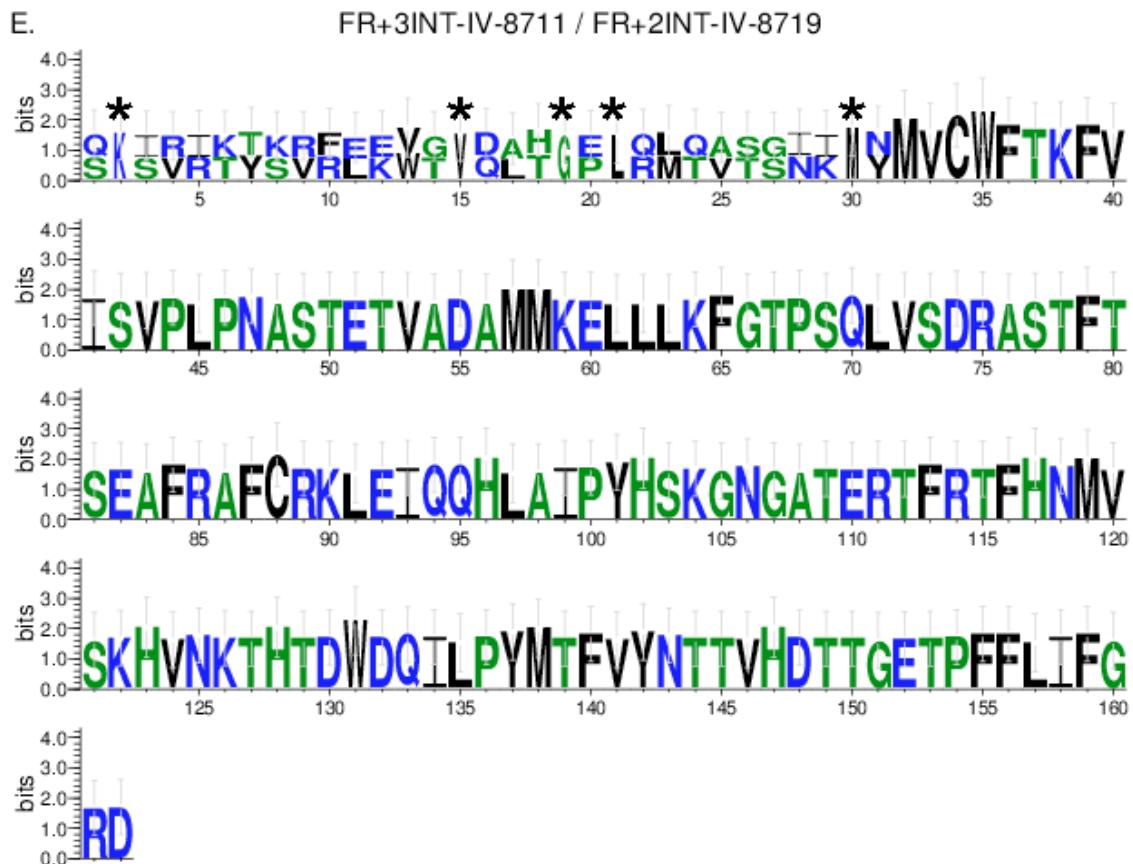

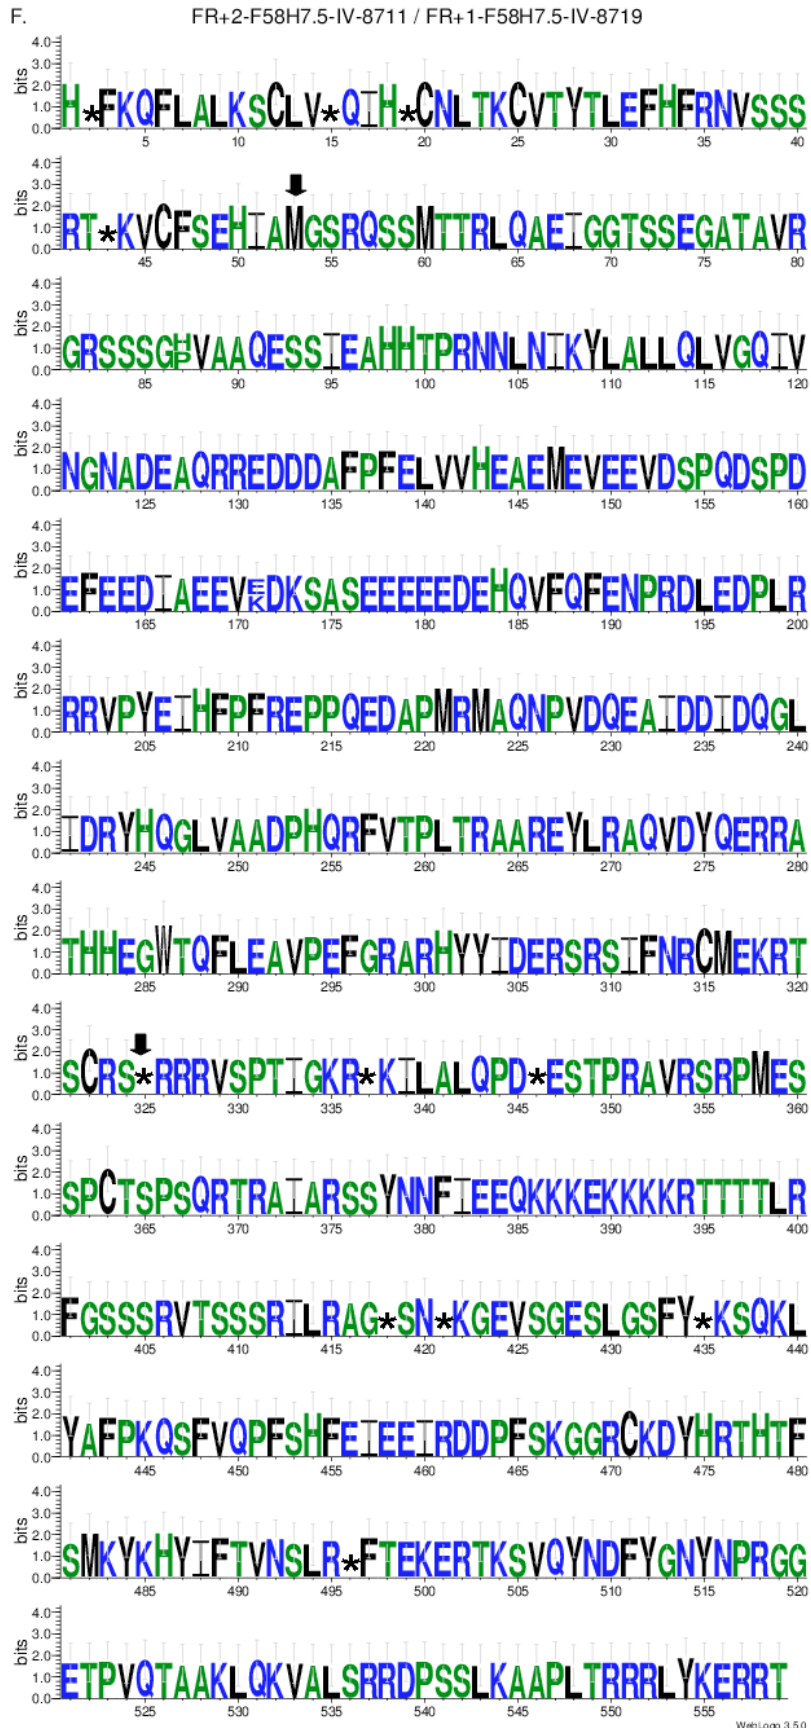

880

881 Figure 4. Retroviral protein domain cladograms. Reverse-transcriptase polymerase A. RNaseH B.  
882 (description in the text)

883 A.

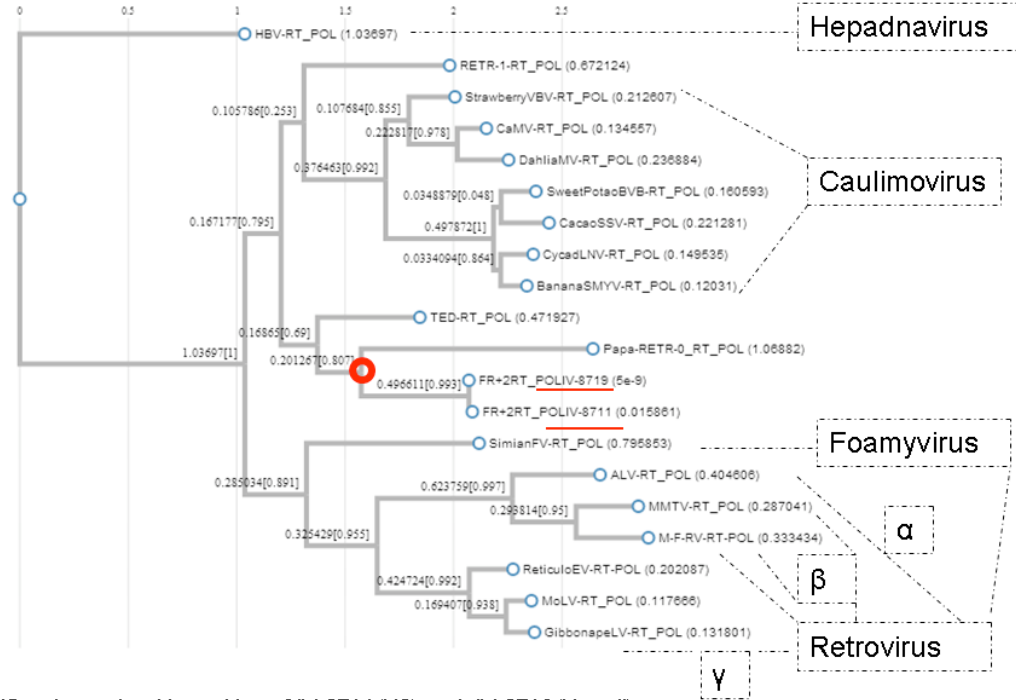

884 ○ Specifies the node with position of IV-8711(N2) and IV-8719(Hawaii)  
in the Reverse-transcriptase polymerase domain tree of retro-transcribing agents.

885

886

887

888

889

890

891

892

893

894

895 B.

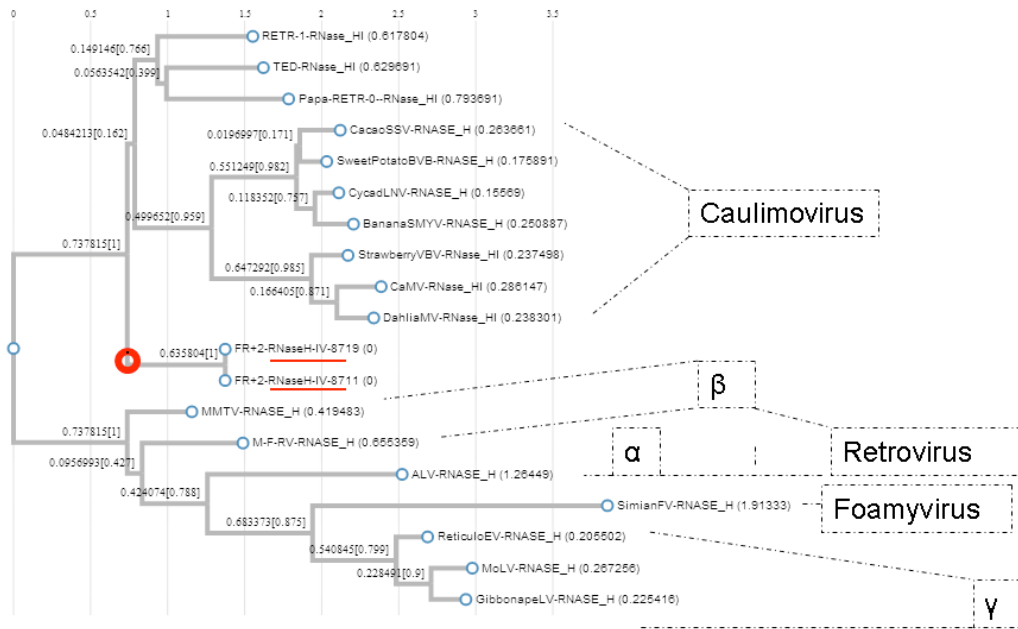

896  Specifies the node with position of IV-8711(N2) and IV-8719(Hawaii)  
in the RNaseH domain tree of retro-transcribing agents.

896

897

898

899

900

901

902

903

904

905

906

907

908

909

910 Fig.5. Genome-scale LTR finder predictions of the candidate LTR pairs. A. Chromosomal  
911 representation of the LTR finder output on N2(Bristol) genome, B. Chromosomal representation  
912 of the LTR finder output on CB4856(Hawaii). The description is included into Tables 1. and 4.

Chr I  
NC\_003279.8  
15,072434 MB

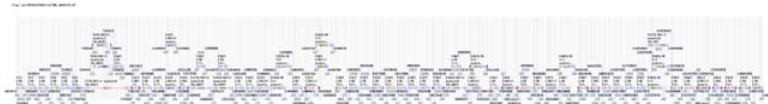

Chr II  
NC\_003280.10  
15,279421 MB

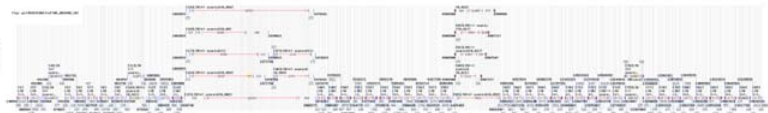

Chr III  
NC\_003281.10  
13,783801 MB

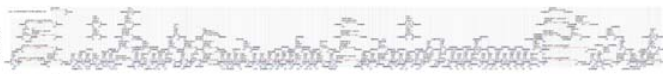

Chr IV  
NC\_003282.8  
17,493829 MB

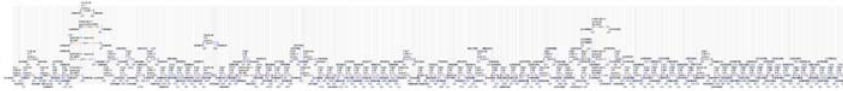

Chr V  
NC\_003283.11  
20,924180 MB

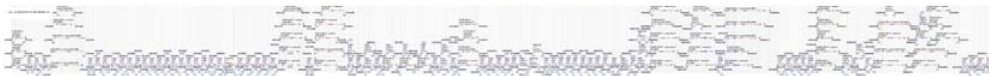

Chr X  
NC\_003284.9  
17,718942 MB

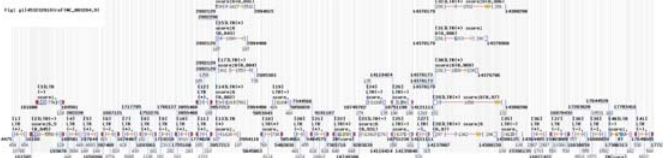

913

Chr I  
CM003206  
14,890789 MB

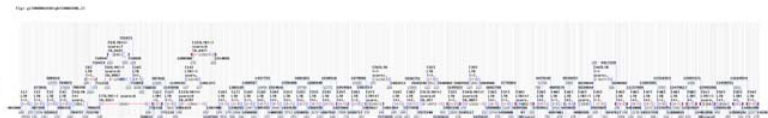

Chr II  
CM003207  
14,885952 MB

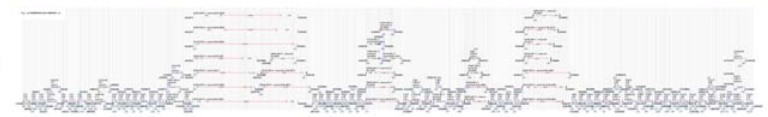

Chr III  
CM003208  
13,596826 MB

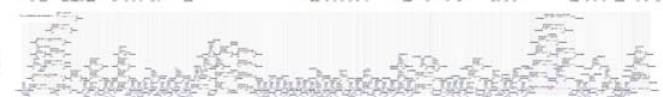

Chr IV  
CM003209  
17,183857 MB

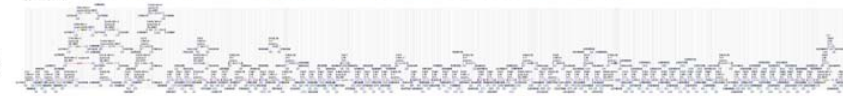

Chr V  
CM003210  
20,182852 MB

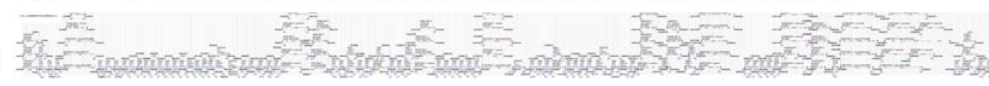

Chr X  
CM003211  
17,537347 MB

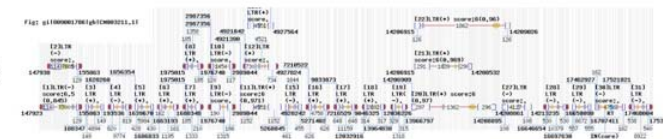

914

915



916 Tables:

917 Table 1. Results of the first-pass genome-scale LTR finder predictions of the endogenous  
 918 retroviral elements inserted in chromosomal assemblies of two *C. elegans* isolates: reference  
 919 N2(Bristol) and CB4856(Hawaii).

| Chr | Retroviral insertion LTR name | N2 insert length | Hawaii insert length | N2 chromosome position | N2 LTR 5'/3' | Hawaii chromosome position | Hawaii LTR 5'/3' |
|-----|-------------------------------|------------------|----------------------|------------------------|--------------|----------------------------|------------------|
| I   | I-CeN2ii-1879 (*)             | 1879             | 1879                 | 13147285 - 13149163    | 245/<br>245  | 12993371 – 12995249        | 245/<br>245      |
|     | I-CeN2ii-5088                 | 5088             | 5088                 | 3847365 - 3852452      | 217/<br>221  | 3776964 - 3782051          | 217/<br>221      |
| II  | II-CeN2-16388                 | 16388            | -                    | 13243641 - 13260028    | 161/<br>161  | -                          | -                |
| III | III-CeN2-8886 (RETR-1)        | 8886             | -                    | 8852597 - 8861482      | 518/<br>513  | -                          | -                |
|     | III-CeN2ii-13588              | 13588            | 13506                | 13229612 - 13243199    | 517/<br>517  | 13044879 - 13058384        | 517/<br>517      |
| IV  | IV-CeN2ii-8711                | 8711             | 8719                 | 912948 - 921658        | 415/<br>415  | 899767 - 908485            | 415/<br>415      |
| V   | V-CeN2ii-10045                | 10045            | 10048                | 4300964 - 4311008      | 318/<br>318  | 4041012 - 4051059          | 316/<br>320      |
|     | V-CeN2-16124                  | 16124            | -                    | 8473016 - 8489139      | 180/<br>193  | -                          | -                |
|     | V-CeN2ii-19860                | 19860            | 19794                | 8825452 - 8845311      | 514/<br>514  | 8520474 - 8540267          | 514/<br>514      |
|     | V-CeN2-11685                  | 11685            | -                    | 17146405 - 17158089    | 444/<br>457  | -                          | -                |
|     | V-CeN2ii-19417                | 19417            | 19417                | 18435912 - 18455328    | 251/<br>244  | 18435912 - 18455328        | 251/<br>244      |
|     | V-CeN2ii-12067                | 12067            | 12540                | 19270045 - 19282111    | 537/<br>537  | 18647618 - 18660157        | 537/<br>537      |
| X   | X-CeN2ii-12453 (**)           | 12453            | 12453                | 9191187 - 9203639      | 648/<br>648  | 9033873 - 9046325          | 648/<br>648      |

|  |               |      |      |                     |             |                     |             |
|--|---------------|------|------|---------------------|-------------|---------------------|-------------|
|  | X-CeN2ii-5078 | 5078 | 5078 | 17644528 - 17649605 | 162/<br>162 | 17462927 - 17468004 | 162/<br>162 |
|--|---------------|------|------|---------------------|-------------|---------------------|-------------|

920 (\*) - denotes unusually short element. (\*\*) – denotes insertion identified on homologous CB4856

921 chromosome by the reciprocal LTR finder match only.

922

923

924

925

926

927

928 Table 2. Open Reading Frames used by predicted protein domains, presented in 5'->3' order in

929 IV-8711 in N2(Bristol) and IV-8719 in CB4856(Hawaii) proviruses. Discordant frames in the

930 catalytic integrase and 3'-ORF are highlighted by doubly lined frame.\* Integrase reading frames

931 were trimmed at N-terminus to limit the mis-alignment due to the frame-shifting mutations (Fig.2).

932

| ORF                   | gag             | Pro             | Pol              | RNaseH             | Integrase<br>(162nt) | 3'-ORF           | 5'->3'              |
|-----------------------|-----------------|-----------------|------------------|--------------------|----------------------|------------------|---------------------|
| Reading<br>frame used | +1              | +1              | +2               | +2                 | +3                   | +2               | IV-8711<br>(N2)     |
|                       | +1              | +1              | +2               | +2                 | +2                   | +1               | IV-8719<br>(Hawaii) |
| Identity(%)           | 95/95<br>(100%) | 95/95<br>(100%) | 175/179<br>(98%) | 121/121<br>(100%), | 131/131<br>(100%)*   | 557/559<br>(99%) |                     |
| similarity(%)         | 95/95<br>(100%) | 95/95<br>(100%) | 177/179<br>(99%) | 121/121<br>(100%)  | 131/131<br>(100%)*   | 558/559<br>(99%) |                     |

933

934

935

936

937 Table 3. InterProScan identifiable retroviral protein domain signature matches of the retrovirus

938 inserted into chromosome IV-8711 of N2 (reference assembly) and assembled IV-8719 of

939 CB4856 (Thompson et al. 2015) compared to RETR-1 (III).

940

| Protein Domain | RT_POL       | RNaseH      | Integrase   | <i>C. elegans</i> isolate |
|----------------|--------------|-------------|-------------|---------------------------|
| RETR-1         | 66/175(38%)  | 51/120(43%) | 51/156(33%) | IV-8711 (N2)              |
| (FR+1)         | 115/175(66%) | 74/120(62%) | 82/156(53%) |                           |
| Identity(%)    | 67/175(38%)  | 51/120(43%) | 47/141(33%) | IV-8719 (Hawaii)          |
| similarity(%)  | 115/175(66%) | 74/120(62%) | 76/141(54%) |                           |

941

942

943

944

945

946

947

948

949

950

951

952

953

954

955 Table 4. LTR finder calculations on the number of the genome scale predictions per  
 956 chromosome. Values do vary, ranging from 2,31 - 1,77 (for chromosome X) to 8,05 and 8,52 (for  
 957 chromosome III and chromosome V) LTR finder predictions per MB in N2(Bristol) and  
 958 CB4856(Hawaii) respectively. While the lowest number of LTR finder predictions per MB is  
 959 observed consistently for sex chromosomes in both isolates, when autosomal predictions are  
 960 included into calculations the association between numbers of predictions calculated on two  
 961 genomes are considered extremely statistically significant (\*\*\*) two tailed  $P < 0.0001$ , Chi-square  
 962 test). The reason for *C. elegans* X chromosomes scoring the lowest values remains to be  
 963 determined, but likely reflects the proportionally lower number of the haplotypic duplications  
 964 maintained on sex chromosomes when compared to autosomes.

965  
 966

| Chr   | N2<br>predictions | Hawaii<br>predictions | N2 chromosome<br>Length (MB) | Hawaii<br>Length (MB) | #Per<br>1MB<br>N2 | #Per<br>1MB<br>Hawaii |
|-------|-------------------|-----------------------|------------------------------|-----------------------|-------------------|-----------------------|
| I     | 65                | 54                    | 15,072434                    | 14,890789             | 4,31              | 3,63                  |
| II    | 85                | 123                   | 15,279421                    | 14,885952             | 5,56              | 8,26                  |
| III   | 111               | 113                   | 13,783801                    | 13,596826             | 8,05              | 8,31                  |
| IV    | 97                | 95                    | 17,493829                    | 17,183857             | 5,54              | 5,53                  |
| V     | 168               | 172                   | 20,924180                    | 20,182852             | 8,03              | 8,52                  |
| X     | 41                | 31                    | 17,718942                    | 17,537347             | 2,31***           | 1,77***               |
| Total | 567               | 588                   | 100,272607                   | 98,277623             | 5,65***           | 5,98***               |

967  
 968  
 969

970

971

972

973

974

975

976

977

978

979

980

981

982

983

984

985
